1 Parasitic manipulation or side effects? The effects of past *Toxoplasma*  
2 and *Borrelia* infections on human personality and cognitive  
3 performance are not mediated by impaired health

4

5 Jaroslav Flegr<sup>1\*</sup>, Jana Hlaváčová<sup>2</sup>, Jan Toman<sup>3</sup>

6 <sup>1,2,3</sup>Laboratory of Evolutionary Biology, Department of Philosophy and History of Sciences,

7 Faculty of Science, Charles University; Viničná 7, 128 00, Prague, Czechia

8 <sup>1</sup> flegr@cesnet.cz; +420 602 876 915

9 <sup>2</sup> hlavajan@natur.cuni.cz

10 <sup>3</sup> tomanj@natur.cuni.cz

11

12 \* Corresponding author

## 13 Abstract

14 Bacteria *Borrelia burgdorferi s. l.* and even more the protozoan *Toxoplasma gondii* are known to  
15 affect the behavior of their animal and human hosts. Both pathogens infect a significant fraction  
16 of human population, and both survive in the host's body for a long time. The resulting latent  
17 infections used to be considered clinically asymptomatic. In the last decade, however, numerous  
18 studies have shown that this view may be wrong and both infections can have various adverse  
19 effects on human health. Their specific behavioral effects may thus be merely side effects of the  
20 general impairment of patients' health. We tested this hypothesis on a cohort of 7,762 members  
21 of internet population using a two-hour-long survey consisting of a panel of questionnaires and  
22 performance tests. Our findings confirmed that subjects infected with *Toxoplasma* were in worse  
23 physical and mental health and those infected with *Borrelia* were in worse physical health than  
24 corresponding controls. The infected and noninfected subjects also differed in several personality  
25 traits (conscientiousness, pathogen disgust, injury disgust, Machiavellianism, narcissism,  
26 tribalism, anti-authoritarianism, intelligence, reaction time, and precision). Majority of the  
27 behavioral effects associated with *Borrelia* infection were the same as those associated with  
28 *Toxoplasma* infection, but some dramatically differed (e.g., performance in the Stroop test). Path  
29 analyses and nonparametric partial Kendall correlation tests showed that these effects were not  
30 mediated by impaired health of the infected individuals. The results thus contradict predictions of  
31 the side effects hypothesis.

## 32 Keywords

33 toxoplasmosis; borreliosis; manipulation hypothesis; big five; dark triad; disgust; memory;  
34 intelligence; political attitudes; side effects hypothesis

## 35 1. Introduction

36 About 20–30% of Czech population have anti-*Toxoplasma* or anti-*Borrelia* IgG antibodies in  
37 their sera. Based on histological data and existing knowledge regarding reactivation of  
38 toxoplasmosis in immunocompromised individuals, e.g., AIDS patients (Luft and Remington,  
39 1992), one can assume that *Toxoplasma*-seropositive subjects carry dormant but viable parasites  
40 in tissue cysts in various organs of their bodies until the end of life. The presence of anti-  
41 *Toxoplasma* IgG antibodies in the serum is therefore viewed as evidence of either latent  
42 (asymptomatic) or, much more rarely, chronic (symptomatic) toxoplasmosis (Robert-Gangneux  
43 and Darde, 2012). The situation is less clear regarding *Borrelia*. It is known, however, that in this  
44 case, too, IgG seropositivity usually persists for about 10–20 years (Kalish et al., 2001). It has  
45 also been demonstrated that viable *Borrelia* spirochetes can survive for decades in biofilms in  
46 human liver, heart, kidney, and brain even after extensive antibiotic treatment (Sapi et al., 2019).  
47 This suggests that latent or chronic borreliosis might also persist for many years after the end of  
48 the acute active phase of infection.

49 It has long been known that *Toxoplasma*-seropositive individuals have an increased risk of many  
50 psychiatric disorders, especially schizophrenia (Torrey et al., 2012; Sutterland et al., 2015), and  
51 that they score differently in various personality (Flegr and Hrdý, 1994; Flegr and Horáček,  
52 2017b) and performance (Havlíček et al., 2001) tests than seronegative controls. Analogous  
53 behavioral changes can be induced by laboratory infection of rats and mice, which suggests that  
54 they are the effect rather than the cause of the infection (Hodková et al., 2007). In humans,  
55 differences between *Toxoplasma*-infected and *Toxoplasma*-free subjects usually increase with  
56 time elapsed since infection and the intensity of changes negatively correlates with the level of  
57 anti-*Toxoplasma* IgG antibodies (Flegr and Havlíček, 1999). This suggests that the observed

58 differences between seropositive and seronegative individuals are due to a slow cumulation of  
59 changes that take place over years of latent infection rather than due to the (decreasing) impact of  
60 the short phase of acute infection.

61 Some of the changes observed in animals are relatively specific, such as for instance the change  
62 of the innate fear of cat smell to attraction to this smell in infected mice and rats (Berdoy et al.,  
63 1995; Vyas et al., 2007). Some even seem to increase the chance of transmitting the parasite from  
64 the infected host to a noninfected individual by predation by, for instance, prolongation of  
65 reaction times (Hrda et al., 2000) in infected rodents and primates (Poirotte et al., 2016),  
66 including humans (Flegr et al., 2011; 2018). The adaptiveness of changes to the host phenotype  
67 in parasites with complex life cycles is notoriously hard to prove (Cezilly et al., 2010) but it has  
68 been demonstrated in a number of cases, including the well-known fish-manipulating trematode  
69 *Euhaplorchis californiensis* (Shaw et al., 2009) or the ant-manipulating trematode *Dicrocoelium*  
70 *dendriticum* (Carney, 1969). The observed behavioral changes in *Toxoplasma*-seropositive  
71 individuals are thus usually also interpreted as the product of the parasite's adaptive manipulative  
72 activity (Moore, 2002).

73 Much less is known about the behavioral effects of anti-*Borrelia* IgG seropositivity. In contrast to  
74 the situation with *Toxoplasma*, any association of *Borrelia* seropositivity with psychiatric  
75 disorders is most likely weak or nonexistent (Grabe et al., 2008; Hernandez-Ruiz et al., 2020;  
76 Tetens et al., 2021) but cf. (Bransfield, 2018). Some behavioral changes have been observed, but  
77 they seem to be merely transient side effects of either current or recent Lyme disease (Makara-  
78 Studzinska et al., 2017; Hundersen et al., 2021; Tetens et al., 2021).

79 From a clinical point of view, a life-long latent *Toxoplasma* infection or *Borrelia* IgG  
80 seropositivity is usually considered insignificant and even asymptomatic. Nevertheless, studies

81 performed over the past decade have shown that both *Toxoplasma* and *Borrelia* IgG seropositive  
82 subjects are in worse health and have a higher incidence of many diseases than seronegative  
83 subjects do (Flegr et al., 2014; Flegr and Escudero, 2016). The most parsimonious and often  
84 suggested explanation of the behavioral changes observed in people with latent infections is thus  
85 that these changes are merely the side effects of their impaired health. The present study explores  
86 the differences in cognitive performance and personality between subjects seropositive and  
87 seronegative for *Toxoplasma* and *Borrelia*. It focuses on testing the side effects hypothesis, i.e., it  
88 explores whether the differences in personality and cognitive performance disappear when the  
89 effect of the seropositive subjects' worse physical and psychological health is controlled for.

## 90 2. Materials and Methods

### 91 2.1. Participants

92 An electronic survey consisting of several questionnaires and performance tests, with only some  
93 related to the present study, was advertised on Facebook and Twitter as a project “studying  
94 interconnections between moral attitudes, cognitive performance, and various biological,  
95 psychological, and sociodemographic factors.” At the beginning of the first questionnaire,  
96 participants were informed that the study is anonymous, and they can terminate their participation  
97 at any time. They were also provided with the following information: “We will investigate which  
98 biological and psychological traits influence your performance test scores and moral attitudes.  
99 We will measure your memory, speed, ability to concentrate, and intelligence.” Only subjects  
100 who confirmed that they were older than 15 and provided informed consent by pressing the  
101 corresponding button were allowed to participate in the study. The study was at least partially  
102 completed by 8,800 subjects between March and June 2022. The project, including the method of

103 obtaining informed consent, was approved by the Institutional Review Board of the Faculty of  
104 Science, Charles University (No. 2021/4).

## 105 2.2. Questionnaires and tests

106 In the survey, we measured the *intelligence* of subjects with the Cattell 16PF test (variant A, scale  
107 B) (Cattell and Mead, 2008) and their *memory* with a modified Meili test (Meili, 1961; Flegr et  
108 al., 2012). In the latter test, participants were at the beginning shown 12 words (knife, frog,  
109 pump, chain, tree, collar, ice, glasses, arrow, train, bars, rifle) for 24 seconds and then, the middle  
110 of the survey (about 20 minutes into it), they were asked to identify these words from a list of 24  
111 words. Psychomotor performance (*reaction time* and *precision* of reaction) was measured using  
112 the Stroop test. This variant of the Stroop test had three parts separated by time needed to read  
113 new instructions and to take some rest. In part A, probands had to select a specified word (for  
114 instance “red”) with their pointing device from a set of four words (“red,” “green,” “blue,”  
115 “brown”) displayed in a random order in the central part of the screen. The four words were  
116 written in red, green, blue, or brown font, and the meaning of the words did not match the font  
117 color. The command specifying which word they were supposed to select was written in the  
118 upper part of the screen. The probands were instructed to ignore the font color. In part B, the  
119 stimuli were the same but the probands were asked to select a word written in a particular color  
120 and ignore the meaning of the displayed words. Part C was similar to part A but the command  
121 specifying which word the proband should select was always written in a different color and that  
122 color matched neither the meaning of the word nor the color of the displayed stimuli. At the  
123 beginning of each part, probands received instructions about the rules of the following subtest,  
124 informed about how many times the test would run (always five times), and were asked to react

125 as quickly as possible. The probands could start each part of the Stroop test by pressing a “Start  
126 test” button.

127 Five personality traits, *extroversion, agreeableness, conscientiousness, emotional stability*, and  
128 *openness to new experiences*, were measured using the Ten Items Personality Inventory (Gosling  
129 et al., 2003). Four facets of disgust (*pathogen disgust, sexual disgust, moral disgust, and injury*  
130 *disgust*) were measured with the Czech version of the Three Domain Disgust Scale (TDDS)  
131 (Tybur, 2009) supplemented with the *injury disgust* scale (Kupfer and Le, 2018). Three aspects of  
132 the dark triad (*Machiavellianism, narcissism, and psychopathy*) were measured using the Czech  
133 version of the Short Dark Triad test (SD3) (Jones and Paulhus, 2014; Mejzlíková et al., 2018) and  
134 four aspects of political attitudes (*tribalism, economic egalitarianism, cultural liberalism, and*  
135 *anti-authoritarianism*) were measured using the Political Beliefs and Values Inventory (PI34)  
136 (Kopecky et al., 2022).

137 In the anamnestic part of the questionnaire, participants responded to 11 questions concerning  
138 their physical health, namely about the frequency of suffering from infectious diseases,  
139 headaches, other physical pains, other chronic or recurring physical problems, frequency of visits  
140 to physicians, frequency of feeling tired, neurological diseases, the number of drugs prescribed  
141 by a physician (not for mental health) they were currently using, how many times they used  
142 antibiotics in the past year, how many times they used antibiotics in the past three years, how  
143 many times they spent more than a week in a hospital in the past five years, and how long they  
144 expected to live. Along similar lines, they were asked four questions concerning their mental  
145 health (frequency of suffering from depression, anxiety, other mental health problems, and how  
146 many kinds of drugs prescribed by a physician for mental health problems they were currently  
147 using). Participants answered these questions using 6-item Likert scales, the sole exception being

148 the two questions about the number of kinds of drugs they were using; for details, see (Flegr et  
149 al., 2021). We computed indices of physical and mental sickness as the mean Z-score of the  
150 corresponding eleven or four questions, respectively. In this part of the survey, respondents were  
151 also asked about their age, sex (males coded as 1, women coded as 0) and whether they were  
152 infected with *Toxoplasma* and/or *Borrelia* (1: “I do not know, I am not sure, I have not been  
153 tested,” 2: “No, I was tested and the result was negative,” 3: “Yes, I was tested and the result was  
154 positive”). For both toxoplasmosis and borreliosis, the questionnaire was preset to indicate as a  
155 default the first response (“I do not know, I am not sure, I have not been tested”). Infected  
156 individuals were coded 3, noninfected ones 2.

### 157 2.3. Data analyses

158 The effects of toxoplasmosis and borreliosis were tested with a nonparametric partial Kendall test  
159 controlled either for sex and age or for sex, age, physical health, and mental health (Flegr and  
160 Flegr, 2021). The effect of multiple tests was controlled with the Benjamini-Hochberg procedure  
161 (FDR = 0.10). The results of the nonparametric analysis were confirmed with a parametric path  
162 analysis using Jamovi 2.2.5 (Jamovi, 2021), PATHj module (Galuci, 2021) and yEd Graph  
163 Editor (yWorks GmbH, <https://www.yworks.com/products/yed>, accessed 5. 11. 2022). The  
164 dataset is available at Figshare (Flegr, 2022b).

165 **Technical notes:** Except for the section Discussion, we use “toxoplasmosis” (“borreliosis”) or  
166 *Toxoplasma-* (*Borrelia-*) infection as an abbreviation for “reported past anti-*Toxoplasma*  
167 (*Borrelia*) seropositivity.” Moreover, throughout the manuscript we use the term “effect” in a  
168 sense common in statistics, that is, to mean an observed association. The sole place where we  
169 discriminate between cause and effect is the Discussion section. In the result section, “p <<  
170 0.001” means  $p < 0.000001$ .



### 171 3. Results

172 The raw dataset contained 4,942 women (mean age = 43.16, sd = 12.52) and 2,820 men (mean  
173 age = 39.80, sd = 12.42). Toxoplasmosis status (codes: negative = 0, positive = 1) was reported  
174 by 796 women (23.9% were positive) and 166 men (12.0% were positive). The effect of sex on  
175 *Toxoplasma* seropositivity was significant (OR = 0.437, C.I.<sub>95</sub> = 0.252-0.724,  $p < 0.001$ ).  
176 *Toxoplasma*-infected women were older (45.0, sd = 10.16) than *Toxoplasma*-free women (42.2,  
177 sd = 11.5),  $p = 0.001$ , Cohen  $d = 0.26$ . Likewise, *Toxoplasma*-infected men were older (42.7, sd =  
178 12.5) than *Toxoplasma*-free men (39.5, sd = 10.3),  $p = 0.218$ , Cohen  $d = 0.26$ . Borreliosis status  
179 (codes: negative = 0, positive = 1) was reported by 1,247 women (519, i.e., 41.6% were positive)  
180 and 531 men (163, i.e., 30.70% were positive). The effect of sex on *Borrelia* seropositivity was  
181 highly significant (OR = 0.621, C.I.<sub>95</sub> = 0.497-0.775,  $p \ll 0.001$ ). *Borrelia*-infected women were  
182 older (45.8, sd = 12.7) than *Borrelia*-free women (42.8, sd = 12.8),  $p = 0.001$ , Cohen  $d = 0.32$ .  
183 *Borrelia*-infected men were also older (44.4, sd = 12.8) than *Borrelia*-free men (37.9, sd = 12.8),  
184  $p \ll 0.001$ , Cohen  $d = 0.51$ . We found a positive association between *Toxoplasma* and *Borrelia*  
185 positivity (OR = 3.34, C.I.<sub>95</sub> = 2.11-5.28,  $p \ll 0.001$ ).

186 Table 1 shows the mean scores for variables related to performance and personality for all  
187 subjects as well as separately for women, men, *Toxoplasma*-negative subjects, *Toxoplasma*-  
188 positive subjects, *Borrelia*-negative subjects, and *Borrelia*-positive subjects. Many behavioral  
189 variables had an irregular distribution. Therefore, we used nonparametric multivariate tests,  
190 namely partial Kendall correlation tests, to search for associations between *Toxoplasma* or  
191 *Borrelia* seropositivity and health, cognitive performance, and personality of the participants  
192 (Table 2, left part). The results showed that *Toxoplasma*-seropositive subjects were in worse  
193 physical and mental health and *Borrelia*-seropositive subjects were in worse physical health than

194 the corresponding controls. The tests also revealed several significant associations between the  
195 infections and behavioral variables, whereby most of these associations remained significant even  
196 after correction for multiple tests. The right part of Table 2 shows the results of analogical  
197 analyses performed with partial Kendall correlation tests controlled not only for sex and age but  
198 also for physical and mental health. A comparison of the left and right parts of the table shows  
199 only very small differences. This suggests that poor physical or mental health does not play a  
200 mediating role in the association between infections and behavioral variables. The same analyses  
201 were performed separately for women and men (Table 3).

202

203 **Table 1 Differences in health and behavioral variables between female and male,**  
204 ***Toxoplasma* seronegative and seropositive, and *Borrelia* seronegative and seropositive**  
205 **participants**

|                   | Women        | Men          | <i>Toxoplasma</i> - | <i>Toxoplasma</i> + | <i>Borrelia</i> - | <i>Borrelia</i> + |
|-------------------|--------------|--------------|---------------------|---------------------|-------------------|-------------------|
| Physical sickness | <b>0.05</b>  | <b>-0.09</b> | <b>0.09</b>         | <b>0.21</b>         | <b>0.06</b>       | <b>0.15</b>       |
| Mental sickness   | <b>0.05</b>  | <b>-0.10</b> | <b>0.03</b>         | <b>0.19</b>         | <b>0.07</b>       | <b>0.10</b>       |
| Education         | <b>6.08</b>  | <b>5.92</b>  | 6.27                | 6.24                | <b>5.94</b>       | <b>6.26</b>       |
| Intelligence      | <b>9.00</b>  | <b>9.48</b>  | 8.98                | 9.16                | <b>8.94</b>       | <b>9.30</b>       |
| Memory            | <b>7.61</b>  | <b>7.21</b>  | 7.71                | 7.51                | 7.60              | 7.54              |
| Reaction time     | 0.01         | 0.00         | <b>-0.04</b>        | <b>0.04</b>         | <b>-0.02</b>      | <b>0.06</b>       |
| Precision         | <b>13.15</b> | <b>13.31</b> | 13.45               | 13.15               | 13.34             | 13.45             |
| Extroversion      | <b>4.35</b>  | <b>3.97</b>  | 4.39                | 4.37                | 4.32              | 4.30              |
| Agreeableness     | <b>4.86</b>  | <b>4.36</b>  | 4.85                | 4.87                | 4.72              | 4.83              |

|                             |             |             |             |             |             |             |
|-----------------------------|-------------|-------------|-------------|-------------|-------------|-------------|
| Conscientiousness           | <b>5.40</b> | <b>4.92</b> | 5.42        | 5.19        | 5.32        | 5.20        |
| Emotional stability         | <b>4.12</b> | <b>4.48</b> | 4.16        | 4.15        | 4.22        | 4.21        |
| Openness to new experiences | 5.00        | 4.99        | 5.12        | 4.98        | 5.04        | 5.09        |
| Pathogen disgust            | <b>3.77</b> | <b>3.47</b> | 3.76        | 3.62        | <b>3.67</b> | <b>3.54</b> |
| Sexual disgust              | <b>3.55</b> | <b>2.31</b> | 3.29        | 3.36        | 3.19        | 3.26        |
| Moral disgust               | <b>4.90</b> | <b>4.65</b> | 4.77        | 4.93        | 4.84        | 4.85        |
| Injury disgust              | <b>4.12</b> | <b>3.89</b> | <b>4.02</b> | <b>3.74</b> | 3.90        | 3.90        |
| Machiavellianism            | <b>2.83</b> | <b>3.11</b> | <b>2.97</b> | <b>2.79</b> | <b>2.98</b> | <b>2.87</b> |
| Narcissism                  | <b>2.46</b> | <b>2.59</b> | 2.58        | 2.47        | <b>2.59</b> | <b>2.51</b> |
| Psychopathy                 | <b>2.34</b> | <b>2.67</b> | 2.45        | 2.39        | 2.47        | 2.44        |
| Tribalism                   | 2.91        | 2.92        | 2.99        | 2.93        | <b>3.01</b> | <b>2.93</b> |
| Economic egalitarianism     | <b>3.10</b> | <b>2.98</b> | 3.12        | 3.09        | 3.08        | 3.09        |
| Cultural liberalism         | <b>4.07</b> | <b>4.11</b> | 4.06        | 4.03        | 4.04        | 4.04        |
| Anti-authoritarianism       | <b>3.11</b> | <b>3.38</b> | 3.16        | 3.16        | 3.17        | 3.18        |

206 *This table shows the arithmetic means of variables listed in the row headings for subpopulations*  
 207 *specified in the column headings. The health indices and reaction times were computed as mean*  
 208 *Z-scores (a higher score means worse health and longer, i.e., worse, reaction times); for other*  
 209 *units, see Methods. Differences significant in two-sided t-tests (without any correction for*  
 210 *multiple tests) are printed in bold.*

212 **Table 2 Association of infections with physical and mental health and various behavioral**  
 213 **traits**

|                             | Controlled for sex and age |                | Controlled for sex, age, and health |                |
|-----------------------------|----------------------------|----------------|-------------------------------------|----------------|
|                             | Toxoplasmosis              | Borreliosis    | Toxoplasmosis                       | Borreliosis    |
| Physical sickness           | <b>0.058*</b>              | <b>0.049*</b>  | 0.042                               | <b>0.052*</b>  |
| Mental sickness             | <b>0.055*</b>              | 0.000          | 0.038                               | -0.018         |
| Education                   | -0.001                     | <b>0.049*</b>  | 0.005                               | <b>0.052*</b>  |
| Intelligence                | <b>0.066*</b>              | <b>0.111*</b>  | <b>0.071*</b>                       | <b>0.113*</b>  |
| Memory                      | -0.011                     | 0.015          | -0.006                              | 0.019          |
| Reaction time               | 0.038                      | 0.010          | 0.036                               | 0.009          |
| Precision                   | -0.024                     | <b>0.037*</b>  | -0.022                              | <b>0.036*</b>  |
| Extroversion                | -0.016                     | -0.023         | -0.010                              | -0.020         |
| Agreeableness               | -0.003                     | 0.016          | 0.002                               | 0.018          |
| Conscientiousness           | <b>-0.091*</b>             | <b>-0.066*</b> | <b>-0.085*</b>                      | <b>-0.065*</b> |
| Emotional stability         | -0.003                     | 0.002          | 0.018                               | 0.006          |
| Openness to new experiences | <b>-0.047</b>              | 0.018          | -0.044                              | 0.020          |
| Pathogen disgust            | <b>-0.048</b>              | <b>-0.049*</b> | <b>-0.051</b>                       | <b>-0.052*</b> |
| Sexual disgust              | -0.024                     | -0.032         | -0.024                              | -0.033         |
| Moral disgust               | 0.009                      | -0.015         | 0.012                               | -0.015         |
| Injury disgust              | <b>-0.056*</b>             | 0.002          | <b>-0.056*</b>                      | 0.001          |

|                         |                |                |                |                |
|-------------------------|----------------|----------------|----------------|----------------|
| Machiavellianism        | <b>-0.072*</b> | -0.030         | <b>-0.077*</b> | -0.031         |
| Narcissism              | -0.044         | <b>-0.039*</b> | -0.043         | <b>-0.037*</b> |
| Psychopathy             | -0.007         | 0.028          | -0.014         | 0.027          |
| Tribalism               | <b>-0.047</b>  | <b>-0.065*</b> | <b>-0.049</b>  | <b>-0.068*</b> |
| Economic egalitarianism | -0.026         | 0.002          | -0.033         | 0.000          |
| Cultural liberalism     | -0.006         | 0.024          | -0.005         | 0.024          |
| Anti-authoritarianism   | 0.017          | <b>0.038*</b>  | 0.019          | <b>0.038*</b>  |

214 *The first two columns of the table show the effects (partial Kendall  $\tau$ ) controlled only for sex and*  
 215 *age, while columns 3 and 4 show the results controlled for sex, age, physical health, and mental*  
 216 *health. (The effects of infections on mental health were controlled only for sex, age, and physical*  
 217 *health, and the effects of infections on physical health were controlled only for sex, age, and*  
 218 *mental health). Negative  $\tau$  indicates a negative association with the infection, while positive  $\tau$*   
 219 *indicated positive associations. Significant effects are printed in bold, and asterisks indicate the*  
 220 *effects significant after the correction for multiple tests.*

221

222 **Table 3 Association of infections with physical and mental health and various behavioral**  
 223 **traits in women and men**

|                   | Women         |               | Men           |               |
|-------------------|---------------|---------------|---------------|---------------|
|                   | Toxoplasmosis | Borreliosis   | Toxoplasmosis | Borreliosis   |
| Physical sickness | <b>0.068*</b> | <b>0.061*</b> | -0.001        | 0.018         |
| Mental sickness   | <b>0.073*</b> | 0.025         | -0.059        | <b>-0.069</b> |

|                             |                |                |                |               |
|-----------------------------|----------------|----------------|----------------|---------------|
| Education                   | 0.004          | 0.011          | -0.025         | <b>0.137*</b> |
| Intelligence                | <b>0.057*</b>  | <b>0.092*</b>  | <b>0.137*</b>  | <b>0.157*</b> |
| Memory                      | -0.012         | 0.012          | 0.006          | 0.023         |
| Reaction time               | 0.025          | -0.011         | <b>0.108</b>   | 0.055         |
| Precision                   | -0.005         | 0.033          | <b>-0.157*</b> | 0.041         |
| Extroversion                | -0.014         | -0.021         | -0.032         | -0.026        |
| Agreeableness               | 0.011          | 0.007          | <b>-0.125</b>  | 0.045         |
| Conscientiousness           | <b>-0.094*</b> | <b>-0.078*</b> | -0.064         | -0.023        |
| Emotional stability         | -0.019         | -0.007         | 0.077          | 0.027         |
| Openness to new experiences | <b>-0.056</b>  | 0.016          | 0.013          | 0.017         |
| Pathogen disgust            | -0.043         | <b>-0.057*</b> | -0.075         | -0.030        |
| Sexual disgust              | -0.025         | -0.030         | -0.025         | -0.028        |
| Moral disgust               | -0.007         | -0.029         | 0.103          | 0.015         |
| Injury disgust              | -0.050         | -0.011         | -0.077         | 0.033         |
| Machiavellianism            | <b>-0.059*</b> | -0.030         | <b>-0.150*</b> | -0.030        |
| Narcissism                  | <b>-0.055</b>  | <b>-0.047*</b> | 0.011          | -0.017        |
| Psychopathy                 | 0.000          | <b>0.042</b>   | -0.037         | -0.024        |
| Tribalism                   | -0.031         | <b>-0.071*</b> | <b>-0.141*</b> | -0.047        |
| Economic egalitarianism     | -0.026         | -0.005         | -0.029         | 0.019         |
| Cultural liberalism         | -0.019         | -0.003         | 0.074          | <b>0.085*</b> |
| Anti-authoritarianism       | 0.019          | 0.038          | 0.006          | 0.034         |

224 *This table shows partial Kendall  $\tau$  controlled for age. A negative  $\tau$  indicates a negative*  
225 *association with the infection, while a positive  $\tau$  indicates a positive association. Significant*  
226 *effects are printed in bold. Asterisks indicate effects that remain significant after a correction for*  
227 *multiple tests.*

228  
229 We used a structural equation modeling approach to explore the relationship between infections,  
230 health, and behavioral variables in more detail. Using path analysis, we confirmed the results of  
231 (nonparametric) partial Kendall correlation tests for all examined behavioral variables  
232 significantly associated with the infections in partial Kendall tests. The direct effect of infections  
233 either remained significant or the effects of impaired health and the infection on a behavioral trait  
234 went in opposite directions (Fig. 1, 2). This means that neither the more robust nonparametric nor  
235 the more sensitive parametric methods support the existence of a mediating effect of impaired  
236 health.

237  
238 **Fig. 1 The results of path analyses for toxoplasmosis: investigation of possible mediating**  
239 **effects of physical or mental health.** *Green arrows show positive, red arrows negative, and*  
240 *black arrows nonsignificant correlations. The numbers (standardized path coefficients) and*  
241 *arrow widths indicate the strength of correlations. The number of asterisks (one, two, or three)*  
242 *indicates their significance (0.05, 0.01, and 0.001, respectively). Men are coded with 1, women*  
243 *with 0. A negative path coefficient indicates that, for example, men scored lower on*  
244 *conscientiousness than women did.*

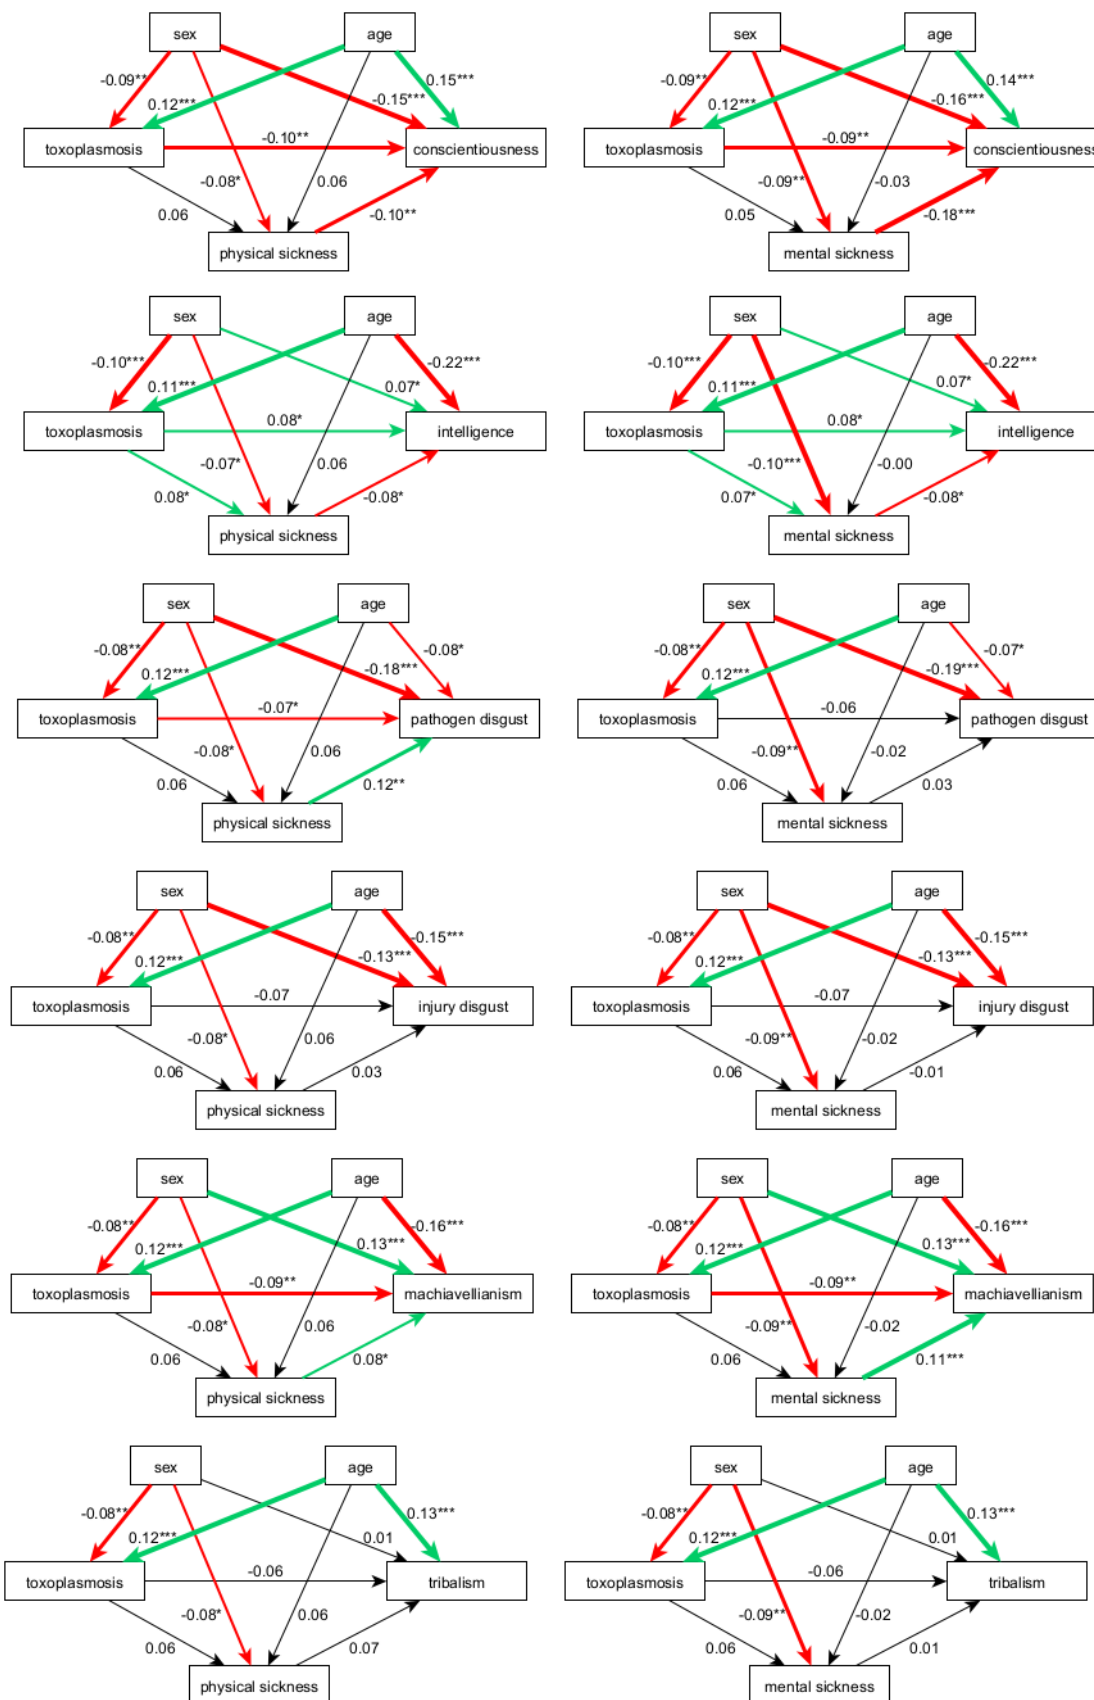



246 **Fig. 2 The results of path analyses for borreliosis: investigation of possible mediating effects**  
247 **of physical or mental health. *For legend, see Fig. 1.***

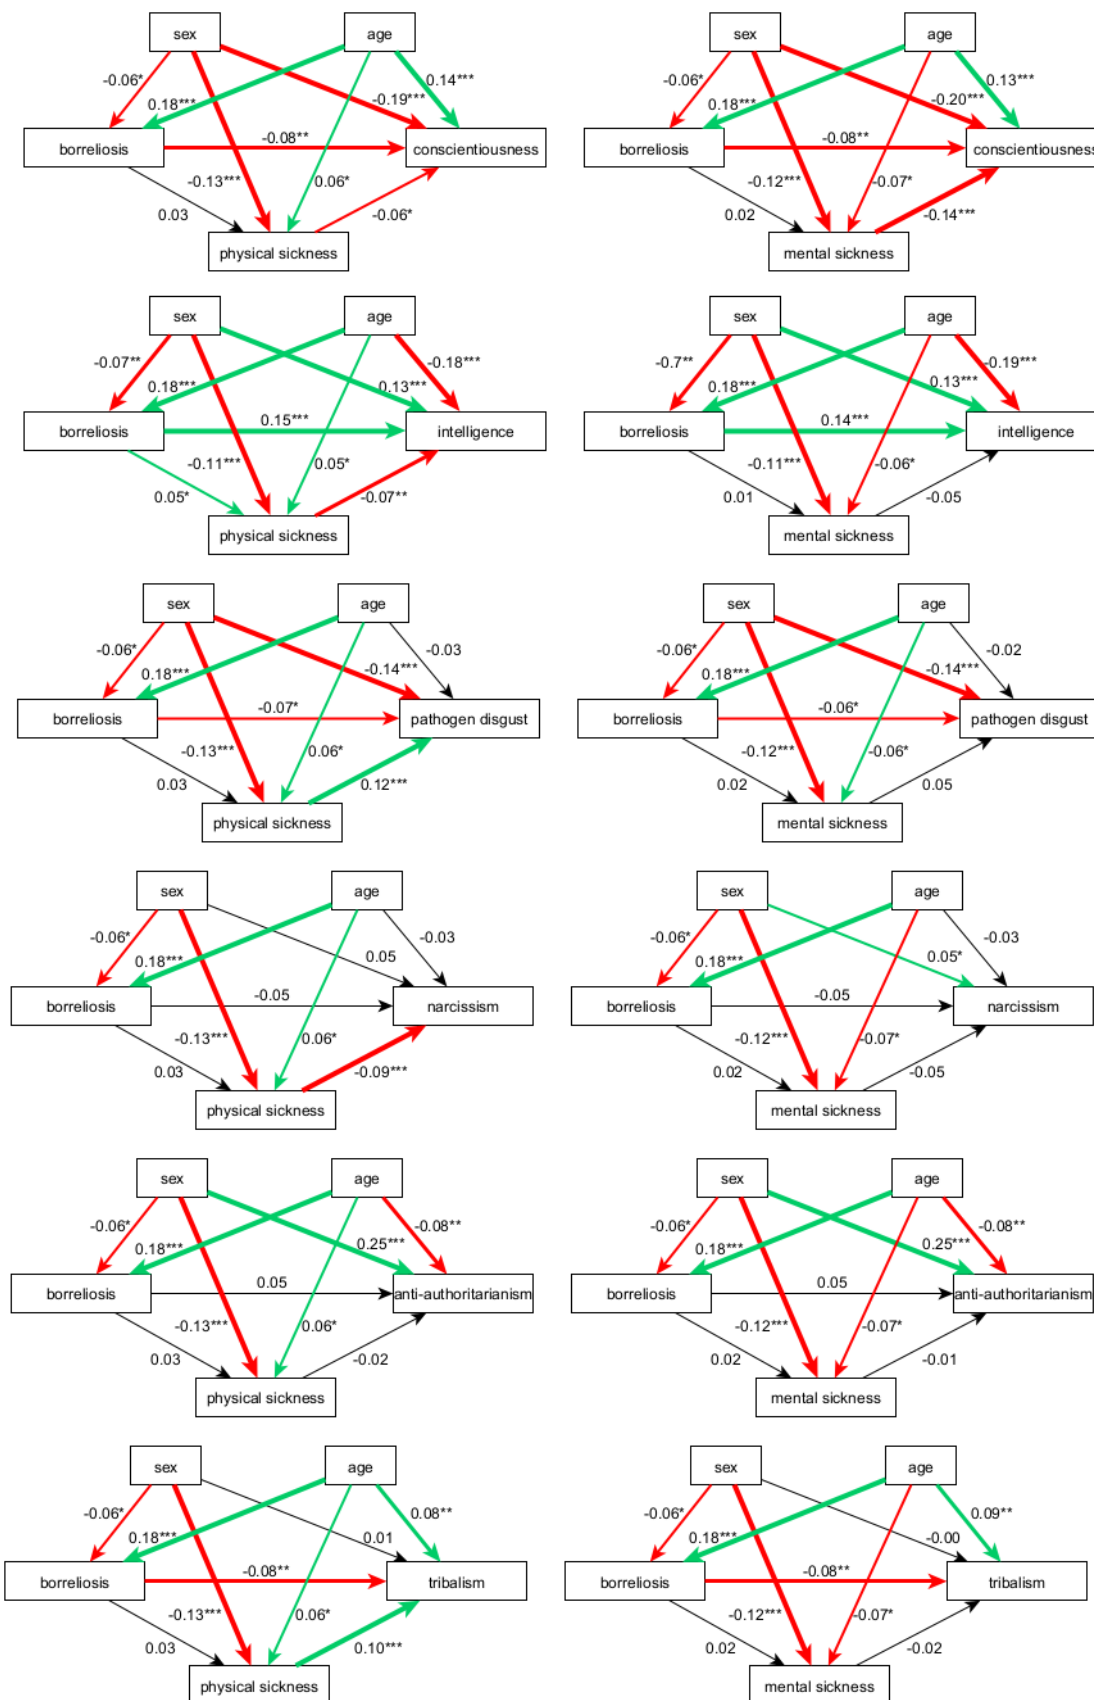

249 One rather counterintuitive result of the present as well as several previously published studies  
250 (Flegr and Havlíček, 1999; Flegr et al., 2013) is the positive effect of seropositivity on  
251 intelligence. We have therefore tested the hypothesis that the effect is mediated by other variables  
252 (e.g., conscientiousness), which could be affected not only by the infection but also for instance  
253 by the age or health status of the subject. Figure 3 shows the results of the corresponding path  
254 analyses. The models contained six variables, namely the participants' age, sex, infection,  
255 physical or mental health, conscientiousness, and intelligence. The results differed for borreliosis  
256 and toxoplasmosis.

257 For toxoplasmosis, the results might partly support a model based on the mediating role of  
258 conscientiousness. When both conscientiousness and mental or physical sickness were included  
259 in the model, the direct effect (i.e., the path coefficient) decreased from 0.08 to 0.05, and thus  
260 turned formally nonsignificant. Therefore, the results suggest that toxoplasmosis negatively  
261 affects conscientiousness, conscientiousness negatively affects intelligence test results, and these  
262 two negative relations could result in a positive relationship between toxoplasmosis and  
263 intelligence. However, the strength of this indirect effect is probably weaker than the direct effect  
264 of toxoplasmosis on intelligence. Also, toxoplasmosis increased mental sickness, and mental  
265 sickness again led to decreased conscientiousness. Nevertheless, this conscientiousness-mediated  
266 positive effect of mental sickness on intelligence was canceled by a much stronger direct negative  
267 effect of mental sickness on intelligence (Fig. 3).

268 In the case of borreliosis, a path analysis yielded no support for a model based on the mediating  
269 effect of conscientiousness. Here, the direct positive effect of the infection on intelligence did not  
270 decrease when conscientiousness and physical or mental health were included in the models (Fig.  
271 3, bottom part).

272

273 **Fig. 3 Path analysis: search for a mediating effect of conscientiousness on intelligence.** *For*

274 *legend, see Fig. 1.*

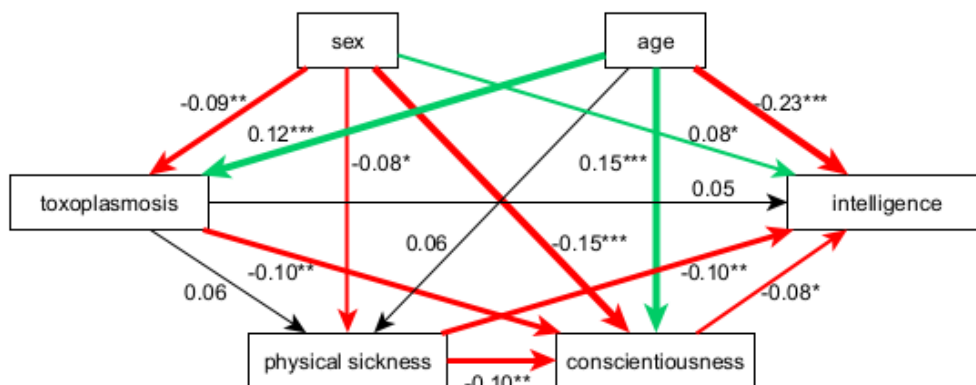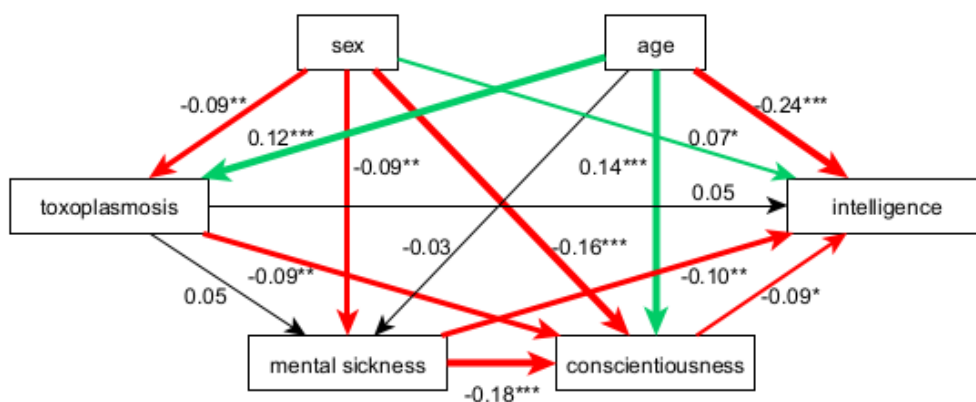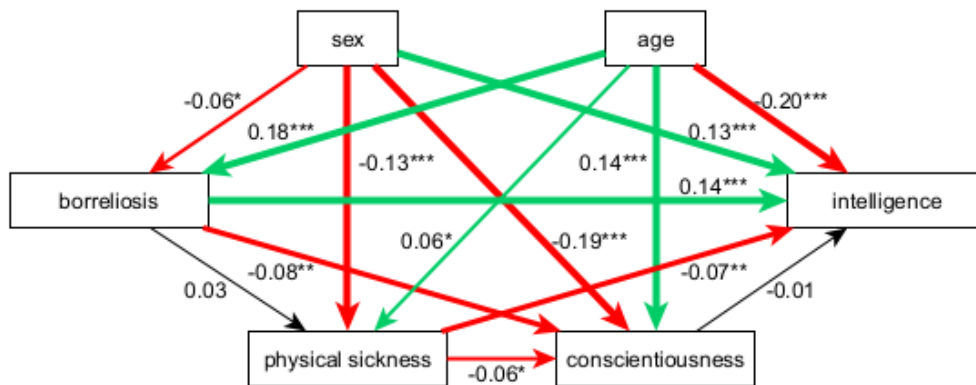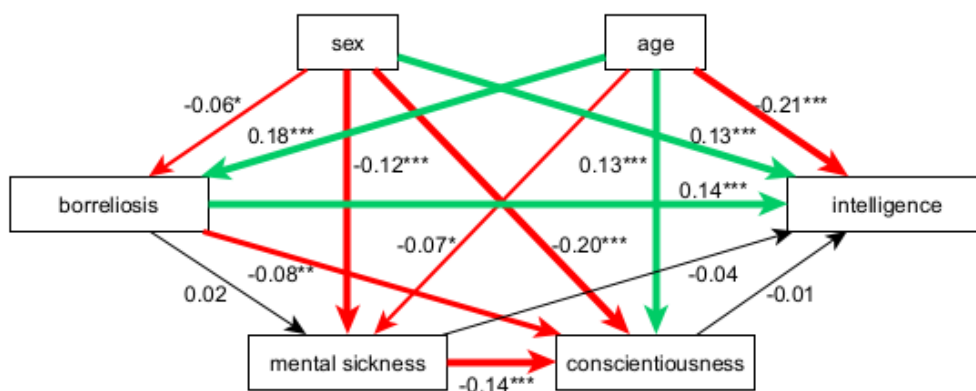

276 We performed a similar analysis to search for a possible mediation effect of education. That  
277 analysis showed a robust positive association between education and intelligence (path  
278 coefficient  $> 0.4$ ; results are not shown). However, we found no association between education  
279 and *Toxoplasma* or *Borrelia* seropositivity. Therefore, education cannot be responsible for the  
280 positive association between infections and intelligence.

## 281 4. Discussion

282 In the study's confirmatory part, we tested the hypothesis that the observed differences in  
283 cognitive performance and personality traits between anti-*Toxoplasma* or anti-*Borrelia* IgG  
284 seronegative and seropositive subjects are merely the side effects of impaired physical or mental  
285 health of the infected subjects. We found that seropositive subjects were indeed in worse health,  
286 but the results of multivariate nonparametric tests and path analyses contradicted inferences  
287 derived from the side effects hypothesis. In particular, the strength of all associations between  
288 seropositivity and behavioral traits observed in our relatively large data set remained  
289 approximately the same regardless of whether physical and mental health were controlled for or  
290 not. Moreover, for several output variables the effects of seropositivity and the effect of impaired  
291 health on behavioral variables went in opposite directions.

292 In the study's exploratory part, we confirmed the existence of some previously described effects,  
293 found some yet unknown effects, and obtained some results which disagree with previously  
294 published data. In the case of toxoplasmosis, we confirmed that the infected individuals were in  
295 worse physical and mental health than the corresponding controls. This observation corresponds  
296 to results obtained using similar questionnaire-based studies as well as with results obtained using  
297 other empirical approaches, such as cross-sectional studies performed on serologically tested  
298 volunteers (Flegr and Escudero, 2016) or ecological (correlative) studies conducted in 88

299 countries worldwide or in 29 European countries (Flegr et al., 2014). We have also confirmed  
300 lower conscientiousness but not higher extroversion of seropositive subjects. In one past study,  
301 the Big Five traits were measured using another personality questionnaire (NEO-PI-R) in a (much  
302 younger) population of university students whose *Toxoplasma* status was serologically examined  
303 immediately before the study (Lindová et al., 2012). These differences in the experimental setup  
304 could explain the partly different findings of the two studies, namely the absence of an effect of  
305 toxoplasmosis on extroversion in the present study. We confirmed the effect of *Toxoplasma*-  
306 seropositivity on psychomotor performance. The effects were nonsignificant in women but  
307 significant and relatively strong in men and they showed both longer reaction times and lower  
308 precision (higher number of errors) in *Toxoplasma*-seropositive men. *Toxoplasma*-positive  
309 participants, both men and women, scored higher on intelligence tests than *Toxoplasma*-negative  
310 subjects did. A recent metaanalytic study (de Haan et al., 2021) reported a mild impairment of  
311 cognitive functions in *Toxoplasma*-positive subjects but, for some unknown reason, this study  
312 excluded all studies that used IQ questionnaires. When the intelligence of 191 women tested for  
313 toxoplasmosis during pregnancy was essayed with the Cattell 16PF test, those who were  
314 *Toxoplasma* positive scored higher than those who were *Toxoplasma* negative (Flegr and  
315 Havlíček, 1999). In another study performed on 857 military conscripts (men), authors showed  
316 that *Toxoplasma*-positive subjects scored significantly worse in the OTIS intelligence test (Otis,  
317 1954), But in that study, intelligence negatively correlated with anti-*Toxoplasma* antibodies titer  
318 and therefore positively with the duration of infection, which suggests that the observed lower  
319 performance of *Toxoplasma*-positive subjects in IQ tests was most likely a transient effect of  
320 recent acute toxoplasmosis rather than a cumulative effect of latent toxoplasmosis. Another group  
321 of 502 male soldiers was tested with two IQ tests: the Wiener Matrizen-Test (nonverbal general  
322 intelligence test) and the OTIS verbal intelligence test (Flegr et al., 2013). In that study, the RhD-

323 positive *Toxoplasma*-infected subjects scored lower, while RhD-negative *Toxoplasma*-infected  
324 subjects scored higher on intelligence than their *Toxoplasma*-free peers. To summarize,  
325 *Toxoplasma*-positive and *Toxoplasma*-negative subjects usually differ in their performance in  
326 intelligence tests, but the direction of the observed association varies between studies. This  
327 suggests that the observed changes in intelligence are rather a side effect of other effects of the  
328 infection or that, possibly, some unknown variable independently influences both intelligence and  
329 the probability of being seropositive.

330 We found no effect of *Toxoplasma* positivity on memory as measured with a modified Meili test.  
331 In contrast, several recent studies have reported impairments of some – but not all – memory  
332 functions in *Toxoplasma*-positive subjects (Mendy et al., 2015a, b; Wiener et al., 2020). Our  
333 present results concerning political attitudes sharply contrast with those published recently in  
334 another study (Kopecky et al., 2022). In the present study, we found a negative association of  
335 *Toxoplasma* positivity with tribalism (tribal conscientiousness and loyalty, exaltation of own  
336 tribe, e.g., nation, over other groups), nonsignificant in path analysis, while in a study performed  
337 on data collected by the same method earlier (2016–2018), the association between *Toxoplasma*  
338 positivity and tribalism was positive. We can only speculate about the reasons which may be  
339 driving this change. It is, for example, possible that a dramatic shift in political attitudes which  
340 took place in the Czech population after the beginning of the Russian invasion of Ukraine may  
341 have affected the nature of association between toxoplasmosis and tribalism. Before the war in  
342 Ukraine, tribalism (especially in its extreme forms) was very unpopular among altruistic  
343 participants of our (long and unpaid) questionnaire studies. The war in Ukraine, which broke out  
344 near our borders, led to an increased sense of threat by Russia and the arrival of over 300,000  
345 Ukrainian refugees, may have changed this attitude significantly in many altruistic participants of



346 our studies. If toxoplasmosis primarily affects altruism, then the infection might correlate  
347 negatively with tribalism before the start of the Ukraine war and positively after its start. Path  
348 analysis shows that both toxoplasma seropositivity and tribalism positively associate with age.  
349 The effect of age alone, however, does not explain the striking differences between current and  
350 previous study,

351 As far as we know, the relationship between toxoplasmosis and the dark triad traits or disgust has  
352 not been studied before. We found that *Toxoplasma*-positive subjects, especially men, scored  
353 lower on Machiavellianism and *Toxoplasma*-positive women scored lower also on narcissism.  
354 We included the dark triad test in the survey because we anticipated that impaired health might  
355 affect the life strategy of individuals (who would shift from a slower to a faster life strategy)  
356 (Sýkorová and Flegr, 2021), which in turn would affect at least some of these traits. Our results,  
357 however, showed that the effects of toxoplasmosis and impaired health on these traits went in the  
358 opposite direction.

359 We found a robust negative association of pathogen disgust and injury disgust (in this case  
360 nonsignificant but still relatively strong in path analysis) with *Toxoplasma* positivity. It is  
361 possible that higher levels of pathogen and injury disgust could protect people against  
362 *Toxoplasma* infection. It is essential to note that pathogen disgust was negatively associated with  
363 both *Toxoplasma* and *Borrelia* positivity, while injury disgust was associated only with  
364 *Toxoplasma* positivity. One can reduce the risk of *Toxoplasma* infection by avoiding the  
365 consumption of raw meat and by increasing hygienic standards. What is less clear, though, is how  
366 higher pathogen disgust could reduce the risk of *Borrelia* infection (the risk of tick bites). One  
367 possibility is that pathogen disgust correlates with disgust towards ectoparasites, a hypothesis  
368 which finds support for instance in (Lorenz et al., 2014). It is rather difficult to explain how

369 injury disgust could decrease the risk of *Toxoplasma* infection. *Toxoplasma* can be transmitted by  
370 blood but in modern times, this transmission route is most likely rather rare. One speculation  
371 could be that a higher propensity to eat raw meat is associated with decreased disgust in general  
372 (injury disgust included), as attested by findings according to which digestion of raw meat is a  
373 powerful disgust trigger (Angyal, 1941). Another possible explanation follows from the results of  
374 path analysis. In this analysis, injury disgust showed association with age and sex that may  
375 possibly drive both the probability of becoming toxoplasma seropositive and the differences in  
376 injury disgust.

377 In the present study, we confirmed that *Borrelia*-positive individuals were in worse physical but  
378 not mental health than the corresponding controls (Flegr and Horáček, 2018). Behavioral effects  
379 of borreliosis are studied very rarely. The search for the combination of terms toxoplas\* AND  
380 behavio\* yielded 1,008 hits, about 98% of which focused on the effects of toxoplasmosis on the  
381 behavior of intermediate mammal hosts or the mental health of humans (Web of Science, Core  
382 Collection, 17. 8. 2022). In contrast, an analogical search for borrel\* AND behavio\* resulted in  
383 383 hits, only 11 (2.8%) of which dealt with the effect of borreliosis on behavior or mental  
384 health. Moreover, these 11 studies investigated either neuroborreliosis or acute borreliosis.  
385 Therefore, the part of our study concerning the behavioral effects of *Borrelia* seropositivity had  
386 an explorative character and the observed associations cannot be compared with previously  
387 published data. If nothing else, it should be noted that the positive association of intelligence with  
388 *Borrelia* positivity was nearly two times stronger than the equivalent association with  
389 *Toxoplasma* positivity ( $\tau$  0.111 vs. 0.066).

390 In contrast to the situation with *Toxoplasma*, *Borrelia*-positive subjects scored higher on achieved  
391 education (only men) as well as precision (they achieved a higher number of correctly selected

392 targets in the Stroop test). Similar to the situation with *Toxoplasma*, we found no effect of  
393 *Borrelia* positivity on memory. *Borrelia*-positive men and women scored lower on  
394 conscientiousness, pathogen disgust, and tribalism than their *Borrelia*-negative peers. These three  
395 negative associations were also observed with *Toxoplasma* positivity. In contrast to the situation  
396 with *Toxoplasma*, the negative association of *Borrelia* positivity with Machiavellianism was  
397 insignificant in both tests, whereas the same association with narcissism was significant only in  
398 Kendall correlation test. We also found a positive association of *Borrelia* positivity but not  
399 *Toxoplasma* positivity with anti-authoritarianism. In conclusion, majority of the behavioral  
400 effects of *Borrelia* seropositivity were the same as those observed in *Toxoplasma* seropositivity.  
401 A few, however, differed and in some cases even dramatically so (namely the performance in the  
402 Stroop test).

403 The main limitation of the present study is that the participants reported their serostatuses  
404 themselves. We asked them to rely only on the results of laboratory tests. However, some  
405 participants might have confused pathogens, and others might have misinterpreted the test results,  
406 possibly confusing IgG and IgM seronegativity. Also, some could acquire the infection after past  
407 negative tests. It must be reminded that such issues could result in the Type II error – the failure  
408 to detect an existing effect but not in the Type I error – detecting a nonexistent effect (Flegr and  
409 Horáček, 2017a). Another limitation of the study is that the participants were self-selected. The  
410 age structure of the sample and the general adult population of the Czech Republic was similar;  
411 however, women were strongly overrepresented in the sample. Most importantly, only altruistic  
412 and curious people probably voluntarily participated in similar (unpaid) studies. The composition  
413 of the sample, therefore, does not reflect the composition of the general Czech population, and  
414 everybody must be careful in the generalization of our results. This issue, however, concerns all

415 studies that fulfill modern ethical standards, i.e., which explain in the informed consent the  
416 voluntary nature of participation in the study.

## 417 5. Conclusions

418 Our results suggest that the behavioral effects of latent toxoplasmosis and borreliosis are direct  
419 effects of the infections rather than side effects of impaired health of the infected subjects. It  
420 should be born in mind, however, that neither path analysis nor any type of correlation analysis  
421 can confirm the validity of a model. For example, neither path analysis nor any other statistical  
422 technique can exclude or confirm the involvement of unknown factors which are not included in  
423 the models. Moreover, a statistical analysis of observational data cannot discriminate between the  
424 cause and effect in particular associations, i.e., it cannot say anything about the direction of  
425 arrows connecting pairs of variables in the model. For example, no statistical technique can  
426 decide whether the positive association between intelligence and *Toxoplasma* or *Borrelia*  
427 seropositivity is the result of a positive (direct or indirect) effect of higher intelligence on the risk  
428 of infection or the result of a positive (direct or indirect) effect of the infection on intelligence.  
429 Only an experimental study, not an observational study, could discriminate between these two  
430 fundamentally different models. For obvious ethical reasons, experimental studies cannot be  
431 performed on humans.

432 Moreover, neither observation nor experiment can decide whether a particular behavioral change  
433 is a side effect of some process associated with the infection or the product of the parasite's  
434 manipulation activity. It is often the case that a positive effect of some behavioral change on the  
435 biological fitness of the parasite is viewed as amounting to evidence that the change is the  
436 product of manipulation activity of the parasite. It should be, however, noted that nonspecific side  
437 effects may increase the biological fitness of a parasite as well (Flegr, 2022a).

438 On the other hand, statistical analyses of data from observational and experimental studies can  
439 refute or at least fundamentally challenge the validity of some models. This is the case of our  
440 analysis, which in effect refuted the possibility that the observed differences in cognitive  
441 performance and personality traits are merely side effects of the impaired health of infected  
442 individuals. This model is just one of many possible models, but it was the most feasible one until  
443 the current study was completed.

444

## 445 Acknowledgments

446 We would like to thank Anna Pilátová for the final revisions of our text.

447 **Funding:** This research was supported by Czech Science Foundation, grant number 22-20785S.

448 Our sponsor had no involvement in the study design, the collection, analysis and interpretation of  
449 data, the writing of the report, or in the decision to submit the article for publication.

450 **Declarations of interest:** none

451

## 452 References

453 Angyal, A., 1941. Disgust and related aversions. *J. Abnorm. Soc. Psychol.* 36, 393–412. doi:

454 10.1037/h0058254

455 Berdoy, M., Webster, J.P., Macdonald, D.W., 1995. The manipulation of rat behaviour by

456 *Toxoplasma gondii*. *Mammalia* 59, 605-613. doi: 10.1515/mamm.1995.59.4.605

457 Bransfield, R.C., 2018. Neuropsychiatric Lyme borreliosis: an overview with a focus on a

458 specialty psychiatrist's clinical practice. *Healthcare* 6, 23. doi: 10.3390/healthcare6030104

- 459 Carney, W.P., 1969. Behavioral and morphological changes in carpenter ants harboring  
460 dicrocoeliid metacercariae. *Am. Midl. Nat.* 82, 605-611. doi: 10.2307/2423801
- 461 Cattell, H.E.P., Mead, A.D., 2008. The Sixteen Personality Factor Questionnaire (16PF). In:  
462 Boyle, G.J., Saklofske, G.M.D. (Eds.), *The Sage handbook of personality theory and assessment*.  
463 Sage Publications, Los Angeles, pp. 295-312.
- 464 Cezilly, F., Thomas, F., Medoc, V., Perrot-Minnot, M.J., 2010. Host-manipulation by parasites  
465 with complex life cycles: adaptive or not? *Trends Parasitol.* 26, 311-317. doi:  
466 10.1016/j.pt.2010.03.009
- 467 de Haan, L., Sutterland, A.L., Schotborgh, J.V., Schirmbeck, F., de Haan, L., 2021. Association  
468 of *Toxoplasma gondii* seropositivity with cognitive function in healthy people: A systematic  
469 review and meta-analysis. *JAMA Psychiatry* 78, 1103-1112. doi:  
470 10.1001/jamapsychiatry.2021.1590
- 471 Flegr, J., 2022a. Adaptations, By-products, and Spandrels. In: Shackelford, T.K. (Ed.),  
472 *Cambridge Handbook of Evolutionary Perspectives on Sexual Psychology: Volume 1,*  
473 *Foundations.* Cambridge University Press, Cambridge, pp. 87-113.
- 474 Flegr, J., 2022b. Parasitic manipulation, or side-effects? The effects of past *Toxoplasma* and  
475 *Borrelia* infections on personality and cognitive performance of humans are not mediated by  
476 impaired health - Data set. figshare. Dataset. doi:  
477 <https://doi.org/10.6084/m9.figshare.21151075.v1>
- 478 Flegr, J., Escudero, D.Q., 2016. Impaired health status and increased incidence of diseases in  
479 *Toxoplasma*-seropositive subjects - an explorative cross-sectional study. *Parasitology* 143, 1974-  
480 1989. doi: 10.1017/s0031182016001785

481 Flegr, J., Flegr, P., 2021. Doing exploratory analysis in R with a package Explorer v. 1.0.  
482 Figshare. <https://doi.org/10.6084/m9.figshare.14685825.v1>. Accessed 5. 11. 2022.

483 Flegr, J., Hampl, R., Černochová, D., Preiss, M., Bičíkova, M., Sieger, L., Příplatová, L.,  
484 Kaňková, S., Klose, J., 2012. The relation of cortisol and sex hormone levels to results of  
485 psychological, performance, IQ and memory tests in military men and women. *Neuro*  
486 *Endocrinol. Lett.* 33, 224-235.

487 Flegr, J., Havlíček, J., 1999. Changes in the personality profile of young women with latent  
488 toxoplasmosis. *Folia Parasitol.* 46, 22-28.

489 Flegr, J., Horáček, J., 2017a. *Toxoplasma*-infected subjects report an obsessive-compulsive  
490 disorder diagnosis more often and score higher in obsessive-compulsive inventory. *Eur. Psychiat*  
491 40, 82-87. doi: 10.1016/j.eurpsy.2016.09.001

492 Flegr, J., Horáček, J., 2017b. Toxoplasmosis, but not borreliosis, is associated with psychiatric  
493 disorders: A cross-sectional survey on 46 thousand of subjects. *BioRxiv*. doi:  
494 <https://doi.org/10.1101/231803>

495 Flegr, J., Horáček, J., 2018. Toxoplasmosis, but not borreliosis, is associated with psychiatric  
496 disorders and symptoms. *Schizophr. Res.* 197, 603-604. doi: 10.1016/j.schres.2018.02.008

497 Flegr, J., Hrdý, I., 1994. Influence of chronic toxoplasmosis on some human personality factors.  
498 *Folia Parasitol.* 41, 122-126.

499 Flegr, J., Lenochová, P., Hodný, Z., Vondrová, M., 2011. Fatal attraction phenomenon in  
500 humans: cat odour attractiveness increased for *Toxoplasma*-infected men while decreased for  
501 infected women. *Plos Neglect. Trop. Dis.* 5, e1389. doi: 10.1371/journal.pntd.0001389

- 502 Flegr, J., Milinski, M., Kankova, S., Hula, M., Hlavacova, J., Sykorova, K., 2018. Latent  
503 toxoplasmosis and olfactory functions of Rh positive and Rh negative subjects. PLoS One 13.  
504 doi: 10.1371/journal.pone.0209773
- 505 Flegr, J., Prandota, J., Sovickova, M., Israili, Z.H., 2014. Toxoplasmosis - A global threat.  
506 Correlation of latent toxoplasmosis with specific disease burden in a set of 88 countries. PLoS  
507 One 9, e90203. doi: 10.1371/journal.pone.0090203
- 508 Flegr, J., Preiss, M., Klose, J., 2013. Toxoplasmosis-associated difference in intelligence and  
509 personality in men depends on their Rhesus blood group but not ABO blood group. PLoS One 8,  
510 e61272. doi: 10.1371/journal.pone.0061272
- 511 Flegr, J., Příplatová, L., Hlaváčová, J., Šebánková, B., Žďárský, E., Kaňková, Š., 2021. The  
512 importance of being heterozygote: effects of *RHD*-genotype-sex interaction on the physical and  
513 mental health of a non-clinical population. Sci. Rep. 11, 1-8. doi: 10.1038/s41598-021-00977-1
- 514 Galuci, M., 2021. PATHj: jamovi Path Analysis. (Computer software). Retrieved from  
515 <https://pathj.github.io/>. Accessed 5. 11. 2022
- 516 Gosling, S.D., Rentfrow, P.J., Swann, W.B., 2003. A very brief measure of the Big-Five  
517 personality domains. J. Res. Pers. 37, 504-528. doi: 10.1016/S0092-6566(03)00046-1
- 518 Grabe, H.J., Spitzer, C., Ludemann, J., Guertler, L., Kramer, A., John, U., Freyberger, H.J.,  
519 Volzke, H., 2008. No association of seropositivity for anti-*Borrelia* IgG antibody with mental and  
520 physical complaints. Nord. J. Psychiatr. 62, 386-391. doi: 10.1080/08039480801984230
- 521 Havlíček, J., Gašová, Z., Smith, A.P., Zvára, K., Flegr, J., 2001. Decrease of psychomotor  
522 performance in subjects with latent 'asymptomatic' toxoplasmosis. Parasitology 122, 515-520.  
523 doi: 10.1017/S0031182001007624



524 Hernandez-Ruiz, V., Edjolo, A., Roubaud-Baudron, C., Jaulhac, B., Avila-Funes, J.A., Dartigues,  
525 J.F., Amieva, H., Peres, K., 2020. Association of seropositivity to *Borrelia burgdorferi* with the  
526 risk of neuropsychiatric disorders and functional decline in older adults the aging  
527 multidisciplinary investigation study. *JAMA Neurol.* 77, 210-214. doi:  
528 10.1001/jamaneurol.2019.3292

529 Hodková, H., Kodym, P., Flegr, J., 2007. Poorer results of mice with latent toxoplasmosis in  
530 learning tests: impaired learning processes or the novelty discrimination mechanism?  
531 *Parasitology* 134, 1329-1337. doi: 10.1017/S0031182007002673

532 Hrda, S., Votýpka, J., Kodym, P., Flegr, J., 2000. Transient nature of *Toxoplasma gondii*-induced  
533 behavioral changes in mice. *J. Parasitol.* 86, 657-663. doi: 10.1645/0022-  
534 3395(2000)086[0657:TNOTGI]2.0.CO;2

535 Hundersen, F., Forst, S., Kasten, E., 2021. Neuropsychiatric and psychological symptoms in  
536 patients with Lyme disease: A study of 252 patients. *Healthcare* 9, 733. doi:  
537 10.3390/healthcare9060733

538 Jamovi, 2021. The jamovi project. version 2.2. (Computer software) Retrieved from  
539 <https://www.jamovi.org>. Accessed 5. 11. 2022

540 Jones, D.N., Paulhus, D.L., 2014. Introducing the short Dark Triad (SD3): a brief measure of  
541 dark personality traits. *Assessment*, 21, 28-41. doi: 10.1177/1073191113514105

542 Kalish, R.A., McHugh, G., Granquist, J., Shea, B., Ruthazer, R., Steere, A.C., 2001. Persistence  
543 of immunoglobulin M or immunoglobulin G antibody responses to *Borrelia burgdorferi* 10-20  
544 years after active Lyme disease. *Clin. Infect. Dis.* 33, 780-785. doi: 10.1086/322669

- 545 Kopecky, R., Priplatova, L., Boschetti, S., Talmont-Kaminski, K., Flegr, J., 2022. Le Petit  
546 Machiavellian Prince: Effects of latent toxoplasmosis on political beliefs and values. *Evol.*  
547 *Psychol.* 20, 13. doi: 10.1177/14747049221112657
- 548 Kupfer, T.R., Le, A.T.D., 2018. Disgusting clusters: tryphobia as an overgeneralised disease  
549 avoidance response. *Cogn. Emot.* 32, 729-741. doi: 10.1080/02699931.2017.1345721
- 550 Lindová, J., Příplatová, L., Flegr, J., 2012. Higher extraversion and lower conscientiousness in  
551 humans infected with *Toxoplasma*. *Eur. J. Pers.* 26, 285-291. doi: 10.1002/per.838
- 552 Lorenz, A.R., Libarkin, J.C., Ordning, G.J., 2014. Disgust in response to some arthropods aligns  
553 with disgust provoked by pathogens. *Glob. Ecol. Conserv.* 2, 248-254. doi:  
554 <https://doi.org/10.1016/j.gecco.2014.09.012>
- 555 Luft, B.J., Remington, J.S., 1992. Toxoplasmic encephalitis in AIDS. *Clin. Infect. Dis.* 15, 211-  
556 222. doi: 10.1093/clinids/15.2.211
- 557 Makara-Studzinska, M., Rolla-Szczepanska, R., Urbanska, A., Nowakowska-Domagala, K.,  
558 Stecz, P., 2017. Anxiety and depression in patients infected with *Borrelia burgdorferi*. *Eur. J.*  
559 *Psychiat.* 31, 165-171. doi: 10.1016/j.ejpsy.2017.09.003
- 560 Meili, R., 1961. *Lehrbuch der Psychologischen Diagnostik*. Verlag Hans Huber, Bern.
- 561 Mejzlíková, T., Preiss, M., Maliňáková, J., Raisová, M., Bolceková, E., 2018. Česká validizační  
562 studie škály krátká temná trojice (short dark triad, SD3). *Aplikovaná Psychologie* 5, 255-270.
- 563 Mendy, A., Vieira, E.R., Albatineh, A.N., Gasana, J., 2015a. Immediate rather than delayed  
564 memory impairment in older adults with latent toxoplasmosis. *Brain Behav. Immun.* 45, 36-40.  
565 doi: 10.1016/j.bbi.2014.12.006

566 Mendy, A., Vieira, E.R., Albatineh, A.N., Gasana, J., 2015b. *Toxoplasma gondii* seropositivity  
567 and cognitive functions in school-aged children. *Parasitology* 142, 1221-1227. doi:  
568 10.1017/s0031182015000505

569 Moore, J., 2002. *Parasites and the Behavior of Animals*. Oxford University Press, Oxford.

570 Otis, A.S., 1954. *Otis Quick-Scoring Mental Ability Test, New Edition*. Word Book Co,  
571 Tarrytown-on-Hudson, NY.

572 Poirotte, C., Kappeler, P.M., Ngoubangoye, B., Bourgeois, S., Moussodji, M., Charpentier,  
573 M.J.E., 2016. Morbid attraction to leopard urine in *Toxoplasma*-infected chimpanzees. *Curr. Biol.*  
574 26, R98-R99. doi: 10.1016/j.cub.2015.12.020

575 Robert-Gangneux, F., Darde, M.L., 2012. Epidemiology of and diagnostic strategies for  
576 toxoplasmosis. *Clin. Microbiol. Rev.* 25, 264-296. doi: 10.1128/CMR.05013-11

577 Sapi, E., Kasliwala, R.S., Ismail, H., Torres, J.P., Oldakowski, M., Markland, S., Gaur, G.,  
578 Melillo, A., Eisendle, K., Liegner, K.B., Libien, J., Goldman, J.E., 2019. The long-term  
579 persistence of *Borrelia burgdorferi* antigens and DNA in the tissues of a patient with Lyme  
580 disease. *Antibiotics* 8, 183. doi: 10.3390/antibiotics8040183

581 Shaw, J.C., Korzan, W.J., Carpenter, R.E., Kuris, A.M., Lafferty, K.D., Summers, C.H., Overli,  
582 O., 2009. Parasite manipulation of brain monoamines in California killifish (*Fundulus*  
583 *parvipinnis*) by the trematode *Euhaplorchis californiensis*. *Proc. Biol. Sci.* 276, 1137-1146. doi:  
584 10.1098/rspb.2008.1597

585 Sutherland, A., Fond, G., Kuin, A., Koeter, M., Lutter, R., Van Gool, T., Yolken, R., Szoke, A.,  
586 Leboyer, M., De Haan, L., 2015. Transdiagnostic exploration of the association of *Toxoplasma*

- 587 *gondii* with psychiatric disorders. A systematic review and meta analysis. Eur. Psychiat. 30, 1.  
588 doi: 10.1016/S0924-9338(15)30059-6
- 589 Sýkorová, K., Flegr, J., 2021. Faster life history strategy manifests itself by lower age at  
590 menarche, higher sexual desire, and earlier reproduction in people with worse health. Sci. Rep.  
591 11, 1-18. doi: 10.1038/s41598-021-90579-8
- 592 Tetens, M.M., Haahr, R., Dessau, R.B., Krogfelt, K.A., Bodilsen, J., Andersen, N.S., Moller,  
593 J.K., Roed, C., Christiansen, C.B., Ellermann-Eriksen, S., Bangsborg, J.M., Hansen, K.,  
594 Andersen, C.O., Lebech, A.M., Obel, N., Omland, L.H., 2021. Assessment of the risk of  
595 psychiatric disorders, use of psychiatric hospitals, and receipt of psychiatric medication among  
596 patients with Lyme neuroborreliosis in Denmark. JAMA Psychiatry 78, 177-186. doi:  
597 10.1001/jamapsychiatry.2020.2915
- 598 Torrey, E.F., Bartko, J.J., Yolken, R.H., 2012. *Toxoplasma gondii* and other risk factors for  
599 schizophrenia: An update. Schizophr. Bull. 38, 642-647. doi: 10.1093/schbul/sbs043
- 600 Tybur, J.M., Lieberman, D. L., Griskevicius, V. , 2009. Microbes, mating, and morality:  
601 Individual differences in three functional domains of disgust. J. Pers. Soc. Psychol. 97, 103-122.  
602 doi: 10.1037/a0015474
- 603 Vyas, A., Kim, S.K., Giacomini, N., Boothroyd, J.C., Sapolsky, R.M., 2007. Behavioral changes  
604 induced by *Toxoplasma* infection of rodents are highly specific to aversion of cat odors. P. Natl.  
605 Acad. Sci. USA 104, 6442-6447. doi: 10.1073/pnas.0608310104
- 606 Wiener, R.C., Waters, C., Bhandari, R., 2020. The association of *Toxoplasma gondii* IgG and  
607 cognitive function scores: NHANES 2013-2014. Parasitol. Int. 78. doi:  
608 10.1016/j.parint.2020.102123
